# Supplementary material for: Can Physical Activity Influence Human Gut Microbiota Composition Independently of Diet? A Systematic Review
Source: MDPI journal article supplement (doi:10.3390/nu13061890), 2021-05-31
Supplement: s1 [file s1]

**S1 Table.** Risk of bias assessment summary: review authors' judgements about each methodological quality item for each study included in this review, using the JBI Critical Appraisal Checklist for Analytical Cross-Sectional Studies (2017) [29].

[illegible]

**S2 Table.** Risk of bias assessment summary: review authors' judgements about each methodological quality item for each study included in this review, using the Cochrane Risk of Bias Tool for Randomized Controlled Trials [30].

| <b>Item</b>                                                                                                                    | <b>Taniguchi,<br/>Japan, 2018<br/>[40]</b> | <b>Cronin,<br/>Ireland, 2018<br/>[34]</b> |
|--------------------------------------------------------------------------------------------------------------------------------|--------------------------------------------|-------------------------------------------|
| Domain 1a: Risk of bias arising from the randomization process                                                                 | N                                          | N                                         |
| Domain 1b: Risk of bias arising from the timing of identification or recruitment of participants in a cluster-randomized trial | N                                          | N                                         |
| Domain 2: Risk of bias due to deviations from the intended interventions (effect of adhering to intervention)                  | N                                          | N                                         |
| Domain 3: Risk of bias due to missing outcome data                                                                             | Y                                          | Y                                         |
| Domain 4: Risk of bias in measurement of the outcome                                                                           | Y                                          | Y                                         |
| Domain 5: Risk of bias in selection of the reported result                                                                     | N                                          | N                                         |
| <b>Overall risk-of-bias judgement (Low risk/Some concerns/High risk)</b>                                                       | <b>Some concerns</b>                       | <b>Some concerns</b>                      |
| <b>Y= yes; N=no</b>                                                                                                            |                                            |                                           |
